# Supplementary material for: ATP-dependent substrate transport by the ABC transporter MsbA is proton-coupled
Source: PubMed Central journal article supplement (PMC4979069; doi:10.1038/ncomms12387), 2016-08-08
Supplement: ncomms12387-s1.pdf [file ncomms12387-s1.pdf]

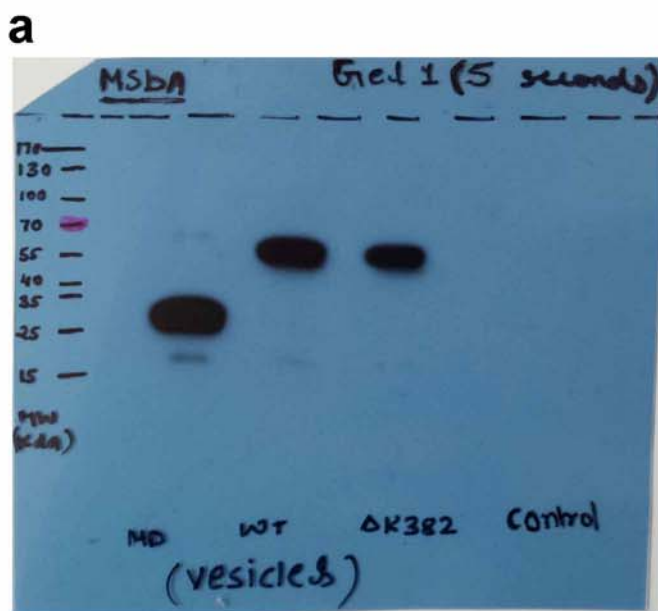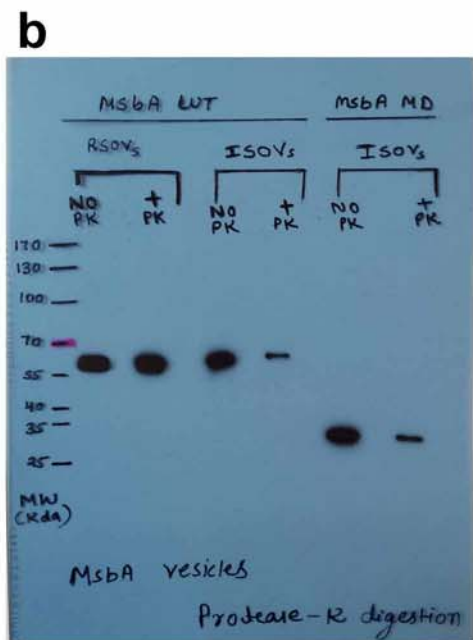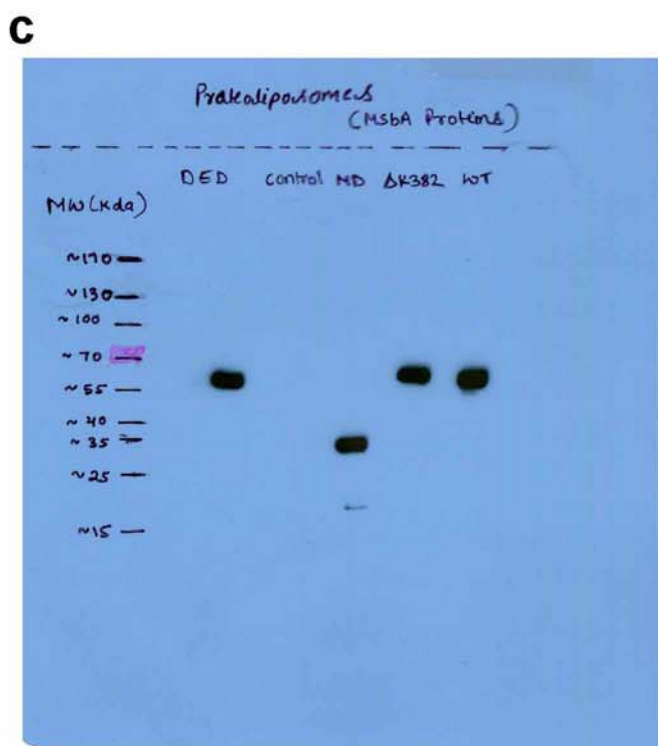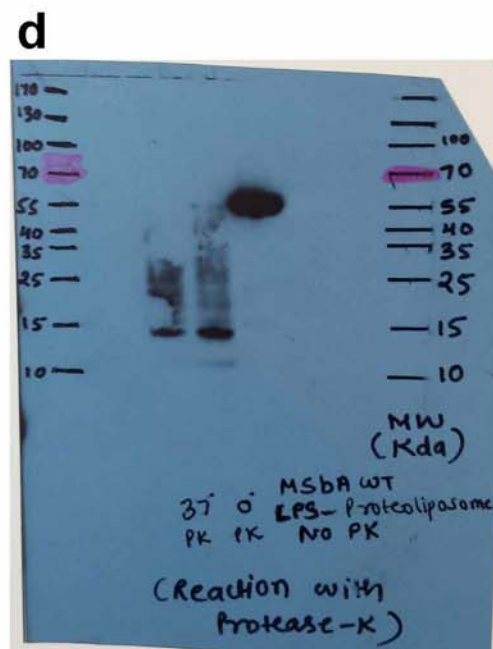

### Supplementary Figure 1

(a) Complete immunoblot of lactococcal plasma membrane vesicles containing MsbA-MD, MsbA-WT, MsbA- $\Delta$ K382, or without MsbA protein (control), utilized in Fig. 1a. (b) Complete immunoblot of right side-out membrane vesicles (RSOVs) and inside-out membrane vesicles (ISOVs) containing MsbA-WT or MsbA-MD before and after exposure to protein kinase K ( $\pm$  PK) in the external buffer, utilized in Fig. 1b. (c) Complete immunoblot of proteoliposomes containing purified MsbA-DED, MsbA-MD, MsbA- $\Delta$ K382 or MsbA-WT, or without MsbA proteins (control), utilized in Fig. 2a. (d) Complete immunoblot of proteoliposomes containing purified MsbA-WT after exposure to PK in the external buffer at 37 °C or 0 °C, and before exposure to PK at 0 °C, utilized in Fig. 2b. The migration of molecular mass markers (kDa) is indicated.
